# Supplementary material
Source: Springer Nature journal article supplement (https://www.springermedizin.de/resource/supplementary/12955_2003_134_MOESM2_ESM.pdf/9559734)
Supplement: MOESM2 [file 9559734]

# Risk factors

Cause

## Personnal Factors

Organic system

Integrity ↔ Impairment

Aptitude

Capacity ↔ Incapacity

## Environnemental factors

Facilitator ↔ Obstacle

Interaction

Social participation ↔ Handicap situation
